# Supplementary material for: A global map of planting years of plantations
Source: PubMed Central journal article supplement (PMC8975943; doi:10.1038/s41597-022-01260-2), 2022-04-01
Supplement: 41597_2022_1260_MOESM1_ESM.pdf [file 41597_2022_1260_MOESM1_ESM.pdf]

# Supplementary

## A global map of planting years of plantations

Zhenrong Du<sup>1,2,3</sup>, Le Yu<sup>3,4,\*</sup>, Jianyu Yang<sup>1,2,\*</sup>, Yidi Xu<sup>3</sup>, Bin Chen<sup>5</sup>, Shushi Peng<sup>6</sup>, Tingting Zhang<sup>1,2</sup>,  
Haohuan Fu<sup>3</sup>, Nancy Harris<sup>7</sup>, and Peng Gong<sup>4,8,9</sup>

<sup>1</sup>College of Land Science and Technology, China Agricultural University, Beijing 100083, China.

<sup>2</sup>Key Laboratory of Agricultural Land Quality, Ministry of Natural Resources of the People's Republic of China, Beijing 100083, China.

<sup>3</sup>Ministry of Education Key Laboratory for Earth System Modeling, Department of Earth System Science, Tsinghua University, Beijing 100084, China.

<sup>4</sup>Ministry of Education Ecological Field Station for East Asia Migratory Birds, Tsinghua University, Beijing 100084, China.

<sup>5</sup>Division of Landscape Architecture, Faculty of Architecture, The University of Hong Kong, Hong Kong SAR, China.

<sup>6</sup>Sino-French Institute for Earth System Science, College of Urban and Environmental Sciences, Peking University, Beijing 100871, China.

<sup>7</sup>World Resources Institute, Washington DC, USA.

<sup>8</sup>Department of Geography and Department of Earth Sciences, The University of Hong Kong, Hong Kong SAR, China.

<sup>9</sup>Institute for Climate and Carbon Neutrality, the University of Hong Kong, Hong Kong, China.

\*corresponding author(s): Le Yu (leyu@tsinghua.edu.cn); Jianyu Yang (ycjyyang@cau.edu.cn)

### Table of contents

| No.       | Title                                                                                   |
|-----------|-----------------------------------------------------------------------------------------|
| Figure S1 | The year where Landsat TM, ETM+ and OLI imagery started to be available.                |
| Table S1  | Countries and the data source year in Spatial Database of Planted Trees (SDPT) product. |
| Table S2  | Correspondence between tree species and band value.                                     |

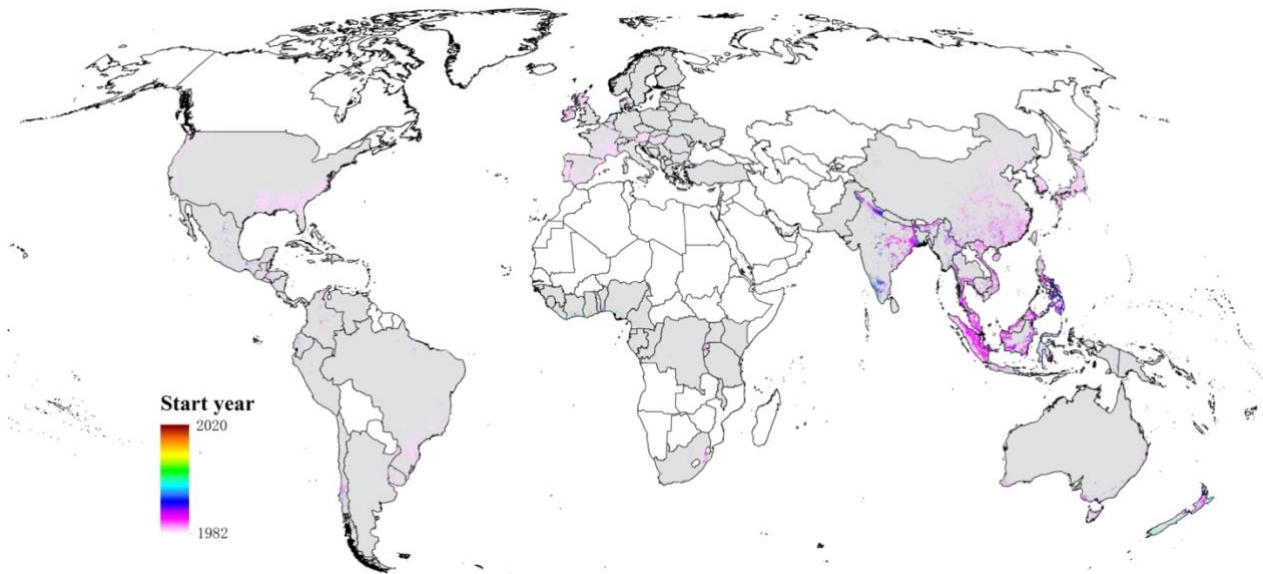

**Figure S1. The year where Landsat TM, ETM+ and OLI imagery started to be available.**

**Table S1. Countries and the data source year in Spatial Database of Planted Trees (SDPT) product.**

| Country             | Source year | Country          | Source year          |
|---------------------|-------------|------------------|----------------------|
| Argentina           | 2013        | Malaysia         | 2013-2015            |
| Australia           | 2013        | Mexico           | 2011-2014            |
| Brazil              | 2013/2014   | Myanmar          | 2002 and 2014        |
| Cambodia            | 2013/2014   | Nepal            | 2015                 |
| Cameroon            | Unknown     | New Zealand      | 2012                 |
| Chile*              | 2016        | Nicaragua        | 2014                 |
| China               | 2004-2008   | Nigeria          | 2013-2015            |
| Colombia            | 2013/2014   | Pakistan         | 2015                 |
| Costa Rica          | 2012        | Panama           | 2014                 |
| Congo, Dem. Rep. of | 2013        | Papua New Guinea | 2012/2015            |
| Ecuador             | 2000, 2014  | Peru             | 2013/2014            |
| Europe              | 2011, 2017  | Philippines      | 2003, 2017           |
| Gabon               | 2013-2015   | Rwanda           | 2008                 |
| Ghana               | 2013-2015   | Solomon Islands  | 2013-2015            |
| Guatemala           | 2012        | South Africa     | 2013/2014            |
| Honduras            | 2013        | South Korea      | Unknown              |
| India               | 2015        | Sri Lanka        | 2013-2015            |
| Indonesia           | 2013-2015   | Thailand         | 2000                 |
| Ivory Coast         | 2013-2015   | Uruguay          | 2015                 |
| Japan               | 1995-1999   | United States    | 2008/2011, 2014/2016 |
| Kenya               | 2010        | Venezuela        | 2014                 |
| Liberia             | 2014        | Vietnam          | 2016                 |
| Malawi              | 2012/2015   |                  |                      |

<sup>1</sup>Source: Compiled by SDPT authors

<sup>2</sup>Note: \*Data includes only 40% of total plantation area

**Table S2. Correspondence between tree species and band value.**

| <b>Band value</b> | <b>Tree species</b>              | <b>Agricultural tree or planted forest</b> |
|-------------------|----------------------------------|--------------------------------------------|
| 1                 | Acacia/Wattle                    | Planted forest                             |
| 2                 | Acacia/Wattle mix                | Planted forest                             |
| 3                 | Acacia/Wattle, Eucalyptus        | Planted forest                             |
| 4                 | Acacia/Wattle, Kirkii            | Planted forest                             |
| 5                 | Acacia/Wattle, Teak              | Planted forest                             |
| 6                 | African Pear                     | Tree crop                                  |
| 7                 | Albizia Mix                      | Planted forest                             |
| 8                 | Alder                            | Planted forest                             |
| 9                 | Alder, Grevillea                 | Planted forest                             |
| 10                | Almond                           | Tree crop                                  |
| 11                | Apple                            | Tree crop                                  |
| 12                | Apricot                          | Tree crop                                  |
| 13                | Areca Palm                       | Tree crop                                  |
| 14                | Ash                              | Planted forest                             |
| 15                | Australian Blackwood             | Planted forest                             |
| 16                | Bamboo                           | Planted forest                             |
| 17                | Bamboo, Eucalyptus, Black Wattle | Planted forest                             |
| 18                | Banana                           | Tree crop                                  |
| 19                | Black Locust                     | Planted forest                             |
| 20                | Black Pine                       | Planted forest                             |
| 21                | Black Spruce                     | Planted forest                             |
| 22                | Black Wattle                     | Planted forest                             |
| 23                | Bocote                           | Planted forest                             |
| 24                | Cacao                            | Tree crop                                  |
| 25                | Cashew                           | Tree crop                                  |
| 26                | Casuarina                        | Planted forest                             |
| 27                | Cedar                            | Planted forest                             |
| 28                | Cherry                           | Tree crop                                  |
| 29                | Chilean Cedar                    | Planted forest                             |
| 30                | Chinese Cork Oak                 | Tree crop                                  |
| 31                | Christmas Tree                   | Tree crop                                  |
| 32                | Citrus                           | Tree crop                                  |
| 33                | Clove                            | Tree crop                                  |
| 34                | Coconut Palm                     | Tree crop                                  |
| 35                | Coconut Palm Mix                 | Tree crop                                  |
| 36                | Coconut Palm, Areca Palm         | Tree crop                                  |
| 37                | Coconut Palm, Fruit              | Tree crop                                  |
| 38                | Coffee                           | Tree crop                                  |
| 39                | Coffee Mix                       | Tree crop                                  |

| <b>Band value</b> | <b>Tree species</b>                     | <b>Agricultural tree or planted forest</b> |
|-------------------|-----------------------------------------|--------------------------------------------|
| 40                | Coffee, Acacia/Wattle                   | Tree crop                                  |
| 41                | Coffee, Albizia                         | Tree crop                                  |
| 42                | Coffee, Oil Palm                        | Tree crop                                  |
| 43                | Cypress                                 | Planted forest                             |
| 44                | Cypress Mix                             | Planted forest                             |
| 45                | Cypress Pine                            | Planted forest                             |
| 46                | Cypress Pine, Eucalyptus                | Planted forest                             |
| 47                | Cypress Pine, Eucalyptus, Pine          | Planted forest                             |
| 48                | Cypress Pine, Pine                      | Planted forest                             |
| 49                | Cypress, Eucalyptus                     | Planted forest                             |
| 50                | Cypress, Grevillea, Eucalyptus          | Planted forest                             |
| 51                | Cypress, Pine                           | Planted forest                             |
| 52                | Douglas Fir                             | Planted forest                             |
| 53                | East Asian Ash                          | Planted forest                             |
| 54                | East Asian Eurya                        | Planted forest                             |
| 55                | East Asian White Birch                  | Planted forest                             |
| 56                | Eucalyptus                              | Planted forest                             |
| 57                | Eucalyptus, Australian Blackwood        | Planted forest                             |
| 58                | Eucalyptus, Bamboo                      | Planted forest                             |
| 59                | Eucalyptus, Bamboo, Umbrella Tree       | Planted forest                             |
| 60                | Eucalyptus, Black Wattle                | Planted forest                             |
| 61                | Eucalyptus, Cypress Pine, Cypress       | Planted forest                             |
| 62                | Eucalyptus, Cypress Pine                | Planted forest                             |
| 63                | Eucalyptus, Grevillea                   | Planted forest                             |
| 64                | Eucalyptus, Grevillea, Pine             | Planted forest                             |
| 65                | Eucalyptus, Pine                        | Planted forest                             |
| 66                | Eucalyptus, Pine, Alder                 | Planted forest                             |
| 67                | Eucalyptus, Pine, Australian Blackwood  | Planted forest                             |
| 68                | Eucalyptus, Pine, Bamboo                | Planted forest                             |
| 69                | Eucalyptus, Pine, Bamboo, Umbrella Tree | Planted forest                             |
| 70                | Eucalyptus, Pine, Cypress               | Planted forest                             |
| 71                | Eucalyptus, Pine, Grevillea, Cypress    | Planted forest                             |
| 72                | Eucalyptus, Umbrella Tree               | Planted forest                             |
| 73                | Eucalyptus, Umbrella Tree, Pine         | Planted forest                             |
| 74                | Fir                                     | Planted forest                             |
| 75                | Fruit                                   | Tree crop                                  |
| 76                | Fruit Mix                               | Tree crop                                  |
| 77                | Fruit, Areca Palm                       | Tree crop                                  |
| 78                | Fruit, Cacao                            | Tree crop                                  |
| 79                | Fruit, Oil Palm                         | Tree crop                                  |

| <b>Band value</b> | <b>Tree species</b>                                | <b>Agricultural tree or planted forest</b> |
|-------------------|----------------------------------------------------|--------------------------------------------|
| 80                | Ginkgo                                             | Tree crop                                  |
| 81                | Gleditsia                                          | Planted forest                             |
| 82                | Gliricidia                                         | Tree crop                                  |
| 83                | Grevillea                                          | Planted forest                             |
| 84                | Grevillea, Cypress                                 | Planted forest                             |
| 85                | Grevillea, Cypress Pine                            | Planted forest                             |
| 86                | Grevillea, Pine                                    | Planted forest                             |
| 87                | Grevillea, Pine, Cypress Pine, Cypress             | Planted forest                             |
| 88                | Grevillea, Senna                                   | Planted forest                             |
| 89                | Jacaranda                                          | Planted forest                             |
| 90                | Jacaranda, Eucalyptus                              | Planted forest                             |
| 91                | Jacaranda, Eucalyptus, Spectacular Cassia          | Planted forest                             |
| 92                | Japanese Bay Tree                                  | Planted forest                             |
| 93                | Japanese Black Pine                                | Planted forest                             |
| 94                | Japanese Flowering Cherry                          | Tree crop                                  |
| 95                | Japanese Rasin                                     | Planted forest                             |
| 96                | Japanese Red Cedar                                 | Planted forest                             |
| 97                | Japanese Red Cedar, Hinoki Cypress, Sawara Cypress | Planted forest                             |
| 98                | Japanese Red Pine                                  | Planted forest                             |
| 99                | Japanese Stone Oak                                 | Tree crop                                  |
| 100               | Jezo Spruce                                        | Planted forest                             |
| 101               | Korean Chestnut                                    | Tree crop                                  |
| 102               | Korean Dendropanax                                 | Tree crop                                  |
| 103               | Korean Pine                                        | Planted forest                             |
| 104               | Korean Red Pine                                    | Planted forest                             |
| 105               | Larch                                              | Planted forest                             |
| 106               | Loblolly Pine                                      | Planted forest                             |
| 107               | Loblolly Pine Mix                                  | Planted forest                             |
| 108               | Loose-Flower Honbeam                               | Planted forest                             |
| 109               | Mahogany                                           | Planted forest                             |
| 110               | Mango                                              | Tree crop                                  |
| 111               | Mangrove                                           | Planted forest                             |
| 112               | Mesquite                                           | Planted forest                             |
| 113               | Monkey Puzzel                                      | Planted forest                             |
| 114               | Mono Maple                                         | Planted forest                             |
| 115               | Monterey Pine                                      | Planted forest                             |
| 116               | Monterey Pine, Shining Gum                         | Planted forest                             |
| 117               | Monterey Pine, Tasmanian Bluegum                   | Planted forest                             |
| 118               | Mulberry                                           | Tree crop                                  |
| 119               | Nectarine                                          | Tree crop                                  |

| <b>Band value</b> | <b>Tree species</b>                      | <b>Agricultural tree or planted forest</b> |
|-------------------|------------------------------------------|--------------------------------------------|
| 120               | Oak                                      | Planted forest                             |
| 121               | Oil Palm                                 | Tree crop                                  |
| 122               | Olive                                    | Tree crop                                  |
| 123               | Orange                                   | Tree crop                                  |
| 124               | Padauk                                   | Planted forest                             |
| 125               | Palm                                     | Tree crop                                  |
| 126               | Palm, Coconut Palm                       | Tree crop                                  |
| 127               | Palm, Fruit                              | Tree crop                                  |
| 128               | Peach                                    | Tree crop                                  |
| 129               | Pear                                     | Tree crop                                  |
| 130               | Pecan                                    | Tree crop                                  |
| 131               | Peltophorum                              | Planted forest                             |
| 132               | Pine                                     | Planted forest                             |
| 133               | Pine Mix                                 | Planted forest                             |
| 134               | Pine, Acacia/Wattle                      | Planted forest                             |
| 135               | Pine, Eucalyptus, Acacia/Wattle, Cypress | Planted forest                             |
| 136               | Pistachio                                | Tree crop                                  |
| 137               | Pitch Pine                               | Planted forest                             |
| 138               | Plum                                     | Tree crop                                  |
| 139               | Pomegranate                              | Tree crop                                  |
| 140               | Poplar                                   | Planted forest                             |
| 141               | Poplar, Willow                           | Planted forest                             |
| 142               | Princess                                 | Planted forest                             |
| 143               | Red Cedar                                | Planted forest                             |
| 144               | Roble                                    | Planted forest                             |
| 145               | Rosewood                                 | Planted forest                             |
| 146               | Rubber                                   | Tree crop                                  |
| 147               | Rubber Mix                               | Tree crop                                  |
| 148               | Rubber, Acacia/Wattle                    | Tree crop                                  |
| 149               | Rubber, Areca Palm                       | Tree crop                                  |
| 150               | Rubber, Coconut Palm                     | Tree crop                                  |
| 151               | Rubber, Coffee                           | Tree crop                                  |
| 152               | Rubber, Eucalyptus                       | Tree crop                                  |
| 153               | Rubber, Fruit                            | Tree crop                                  |
| 154               | Rubber, Mango                            | Tree crop                                  |
| 155               | Rubber, Oil Palm                         | Tree crop                                  |
| 156               | Rubber, Pine                             | Tree crop                                  |
| 157               | Rubber, Teak                             | Tree crop                                  |
| 158               | Sakhalin Fir                             | Planted forest                             |
| 159               | Sakhalin Spruce                          | Planted forest                             |

| <b>Band value</b> | <b>Tree species</b>             | <b>Agricultural tree or planted forest</b> |
|-------------------|---------------------------------|--------------------------------------------|
| 160               | Sal                             | Planted forest                             |
| 161               | Sawleaf Zelkova                 | Planted forest                             |
| 162               | Sawtooth Oak                    | Planted forest                             |
| 163               | Senna                           | Planted forest                             |
| 164               | Shining Gum                     | Planted forest                             |
| 165               | Shortleaf Pine                  | Planted forest                             |
| 166               | Shortleaf Pine Mix              | Planted forest                             |
| 167               | Slash Pine                      | Planted forest                             |
| 168               | Slash Pine Mix                  | Planted forest                             |
| 169               | Southern Beech                  | Planted forest                             |
| 170               | Spanish Cedar                   | Planted forest                             |
| 171               | Spruce                          | Planted forest                             |
| 172               | Tasmanian Bluegum               | Planted forest                             |
| 173               | Tasmanian Bluegum, Shining Gum  | Planted forest                             |
| 174               | Taxodium                        | Planted forest                             |
| 175               | Tea                             | Tree crop                                  |
| 176               | Teak                            | Planted forest                             |
| 177               | Teak Mix                        | Planted forest                             |
| 178               | Teak, Cadam                     | Planted forest                             |
| 179               | Tulip Poplar, Tulip Magnolia    | Tree crop                                  |
| 180               | Umbrella Tree                   | Planted forest                             |
| 181               | Unknown                         | Planted forest                             |
| 182               | Unknown                         | Tree crop                                  |
| 183               | Walnut                          | Tree crop                                  |
| 184               | Walnut, Spruce                  | Tree crop                                  |
| 185               | Wedding Cake                    | Tree crop                                  |
| 186               | White Cedar                     | Planted forest                             |
| 187               | Willow                          | Planted forest                             |
| 188               | Needleleaf                      | Planted forest                             |
| 189               | Mix of needleleaf and broadleaf | Planted forest                             |
| 190               | Broadleaf                       | Planted forest                             |
